# Interactive Domains in the Molecular Chaperone Human $\alpha$ B Crystallin Modulate Microtubule Assembly and Disassembly

Joy G. Ghosh<sup>1</sup>, Scott A. Houck<sup>1</sup>, John I. Clark<sup>1,2\*</sup>

<sup>1</sup> Department of Biological Structure, University of Washington, Seattle, Washington, United States of America, <sup>2</sup> Department of Ophthalmology, University of Washington, Seattle, Washington, United States of America

**Background.** Small heat shock proteins regulate microtubule assembly during cell proliferation and in response to stress through interactions that are poorly understood. **Methodology.** Novel functions for five interactive sequences in the small heat shock protein and molecular chaperone, human  $\alpha$ B crystallin, were investigated in the assembly/disassembly of microtubules and aggregation of tubulin using synthetic peptides and mutants of human  $\alpha$ B crystallin. **Principal Findings.** The interactive sequence  $_{113}\text{FISREFHR}_{120}$  exposed on the surface of  $\alpha$ B crystallin decreased microtubule assembly by  $\sim 45\%$ . In contrast, the interactive sequences,  $_{131}\text{LTITSSLSSDGV}_{142}$  and  $_{156}\text{ERTIPITRE}_{164}$ , corresponding to the  $\beta 8$  strand and the C-terminal extension respectively, which are involved in complex formation, increased microtubule assembly by  $\sim 34\text{--}45\%$ . The  $\alpha$ B crystallin peptides,  $_{113}\text{FISREFHR}_{120}$  and  $_{156}\text{ERTIPITRE}_{164}$ , inhibited microtubule disassembly by  $\sim 26\text{--}36\%$ , and the peptides  $_{113}\text{FISREFHR}_{120}$  and  $_{131}\text{LTITSSLSSDGV}_{142}$  decreased the thermal aggregation of tubulin by  $\sim 42\text{--}44\%$ . The  $_{131}\text{LTITSSLSSDGV}_{142}$  and  $_{156}\text{ERTIPITRE}_{164}$  peptides were more effective than the widely used anti-cancer drug, Paclitaxel, in modulating tubulin $\leftrightarrow$ microtubule dynamics. Mutagenesis of these interactive sequences in wt human  $\alpha$ B crystallin confirmed the effects of the  $\alpha$ B crystallin peptides on microtubule assembly/disassembly and tubulin aggregation. The regulation of microtubule assembly by  $\alpha$ B crystallin varied over a narrow range of concentrations. The assembly of microtubules was maximal at  $\alpha$ B crystallin to tubulin molar ratios between 1:4 and 2:1, while molar ratios  $>2:1$  inhibited microtubule assembly. **Conclusions and Significance.** Interactive sequences on the surface of human  $\alpha$ B crystallin collectively modulate microtubule assembly through a dynamic subunit exchange mechanism that depends on the concentration and ratio of  $\alpha$ B crystallin to tubulin. These are the first experimental results in support of the functional importance of the dynamic subunit model of small heat shock proteins.

Citation: Ghosh JG, Houck SA, Clark JI (2007) Interactive Domains in the Molecular Chaperone Human  $\alpha$ B Crystallin Modulate Microtubule Assembly and Disassembly. PLoS ONE 2(6): e498. doi:10.1371/journal.pone.0000498

## INTRODUCTION

Molecular chaperones are endogenous molecules that participate in the normal folding, processing, organization, and degradation of cellular proteins including cytoskeletal proteins [1–3]. Human  $\alpha$ B crystallin is the archetype of small heat shock proteins (sHSPs) which are low molecular weight ( $<43$  kDa) chaperones that organize and stabilize the cytoskeletal networks of microfilament proteins including actin, the intermediate filaments desmin and glial-fibrillary acidic protein (GFAP), and the microtubule forming protein tubulin [4–16]. In the absence of stress, sHSPs interact directly with tubulin and microtubule associated proteins to promote microtubule assembly and under stress sHSPs protect against microtubule depolymerization [8,17–24]. A recent report suggests that at high concentrations sHSPs inhibit rather than promote microtubule assembly [25]. The systematic characterization of the interactive domains is necessary to understand the functional importance of sHSPs in assembly of cytoskeletal proteins.

In this study, the importance of five human  $\alpha$ B crystallin interactive sequences  $_{41}\text{STSLSPFYLRPPSFLRAP}_{58}$  (ST),  $_{73}\text{DRFSVNLDVKHFS}_{85}$  (DR),  $_{113}\text{FISREFHR}_{120}$  (FI),  $_{131}\text{LTITSSLSSDGV}_{142}$  (LT), and  $_{156}\text{ERTIPITRE}_{164}$  (ER) in the assembly/disassembly of microtubules and the thermal aggregation of tubulin was evaluated using synthetic  $\alpha$ B crystallin peptides and  $\alpha$ B crystallin mutants. Previous protein pin array and mutagenesis studies identified these five interactive sequences in human  $\alpha$ B crystallin for interactions with substrate proteins including lens crystallins, growth factors, and the filamentous proteins desmin, glial-fibrillary acidic protein, and actin [26–28].

The  $\alpha$ B crystallin interactive sequences  $_{131}\text{LTITSSLSSDGV}_{142}$  and  $_{156}\text{ERTIPITRE}_{164}$  promote microtubule assembly and inhibit microtubule disassembly, while the interactive sequence  $_{113}\text{FISREFHR}_{120}$  inhibited both microtubule assembly and disassembly. The remaining two peptides,  $_{41}\text{STSLSPFYLRPPSFLRAP}_{58}$  and  $_{73}\text{DRFSVNLDVKHFS}_{85}$  had little or no effect on microtubule assembly or disassembly. Microtubule assembly varied with the ratio of tubulin to  $\alpha$ B crystallin resolving the apparent contradictions in the results of an  $\alpha$ B crystallin effect on tubulin assembly [19,21,25]. Localization of the tubulin interactive sequences on the surface of  $\alpha$ B crystallin and the dynamic subunit model for sHSP chaperone activity accounts for the observed effects of the synthetic  $\alpha$ B crystallin peptides and the mutant  $\alpha$ B crystallins on tubulin/microtubules.

Academic Editor: Martin Egli, Vanderbilt University, United States of America

Received April 10, 2007; Accepted May 12, 2007; Published June 6, 2007

**Copyright:** © 2007 Ghosh et al. This is an open-access article distributed under the terms of the Creative Commons Attribution License, which permits unrestricted use, distribution, and reproduction in any medium, provided the original author and source are credited.

**Funding:** NEI EY04542

**Competing Interests:** The authors have declared that no competing interests exist.

\* To whom correspondence should be addressed. E-mail: clarkji@u.washington.edu

## MATERIALS AND METHODS

### Materials

Synthetic  $\alpha$ B crystallin peptides DRFSVNLVDVKHFS, STLSLSP-FYLRPPSFLRAP, FISREFHR, LTITSSLSDDGV, and ERTI-PITRE were procured from Advanced ChemTech (Louisville, KY) and Genscript Corporation (Piscataway, NJ).

### Construction, expression, and purification of wt and mutant $\alpha$ B crystallins

The  $\alpha$ B crystallin mutants were constructed using the Quick-Change site-directed mutagenesis kit as described previously [29–32]. The R120G mutant is a single point mutant of the  $^{113}$ FISREFHR $_{120}$  sequence of human  $\alpha$ B crystallin, constructed by replacing Arg-120 with a glycine residue. The  $\alpha$ A $\beta$ 8 mutant was constructed by replacing the  $\alpha$  crystallin core domain  $\beta$ 8 sequence  $^{131}$ LTITSSLS $_{138}$  of human  $\alpha$ B crystallin with the homologous  $\beta$ 8 sequence  $^{127}$ SALSCSLS $_{134}$  of human  $\alpha$ A crystallin. The  $\Delta$ 155–165 mutant was constructed by deleting residues  $^{155}$ ERTIPITRE $_{165}$  from the C-terminus extension of human  $\alpha$ B crystallin. Wt  $\alpha$ B crystallin, R120G,  $\alpha$ A $\beta$ 8, and  $\Delta$ 155–165 were expressed and purified as described previously [30–32].

### Microtubule assembly assays

The effect of selected  $\alpha$ B crystallin peptides on the *in vitro* assembly of tubulin into microtubules was evaluated using the Microtubule Stabilization/Destabilization Assay kit (Cytoskeleton; Denver, CO) as described previously [33]. Bovine brain tubulin was dissolved to 200  $\mu$ M in 80 mM PIPES, 2 mM MgCl<sub>2</sub>, 0.5 mM EGTA, 10  $\mu$ M DAPI, 1 mM GTP pH 6.9. 8.5  $\mu$ l of the tubulin was mixed with 40  $\mu$ l of 80 mM PIPES, 2 mM MgCl<sub>2</sub>, 0.5 mM EGTA, 7.4  $\mu$ M DAPI, 16% Glycerol, 1.1 mM GTP pH 6.9 and 4.3  $\mu$ l of 2 mM peptide in 2.5% DMSO, 2 mM Paclitaxel (polymerization promoter) in 100% DMSO, 15 mM CaCl<sub>2</sub> (polymerization inhibitor) in water, or 2.5% DMSO only. Microtubule assembly was monitored by measuring the fluorescence of DAPI, a molecule whose emission fluorescence at  $\lambda = 460$  is enhanced 8-fold when it is incorporated into assembled microtubules [33]. Fluorescence of samples were continuously read on a Perkin Elmer Victor<sup>3</sup> V fluorescence plate reader (Excitation  $\lambda = 355$  nm, Emission  $\lambda = 460$  nm) at 37°C for 45 minutes.

The effect of wt and three mutant  $\alpha$ B crystallins,  $\Delta$ 41–58,  $\alpha$ A $\beta$ 8, and  $\Delta$ 155–165 on the *in vitro* assembly of tubulin into microtubules was evaluated using the Microtubule Stabilization/Destabilization Assay kit described above (Cytoskeleton; Denver, CO). Bovine brain tubulin was dissolved to 200  $\mu$ M in 80 mM PIPES, 2 mM MgCl<sub>2</sub>, 0.5 mM EGTA, 10  $\mu$ M DAPI, 1 mM GTP pH 6.9. 8.5  $\mu$ l of the tubulin was mixed with 40  $\mu$ l of 80 mM PIPES, 2 mM MgCl<sub>2</sub>, 0.5 mM EGTA, 7.4  $\mu$ M DAPI, 16% Glycerol, 1.1 mM GTP pH 6.9 and 4.3  $\mu$ l of 80  $\mu$ M protein in 20 mM Tris-Cl, pH8.0 or Tris-Cl buffer only. Fluorescence of samples were continuously read on a Perkin Elmer Victor<sup>3</sup> V fluorescence plate reader (Excitation  $\lambda = 355$  nm, Emission  $\lambda = 460$  nm) at 37°C for 45 minutes.

### Microtubule disassembly assays

The effect of  $\alpha$ B crystallin peptides and mutants on the *in vitro* disassembly of microtubules was evaluated using the Microtubule Stabilization/Destabilization Assay kit described above (Cytoskeleton; Denver, CO) using methods described previously [33]. Microtubules were assembled at 37°C in the absence of  $\alpha$ B crystallin peptides,  $\alpha$ B crystallin proteins, and small molecules as described previously. Incubation of microtubules at 23°C results in

spontaneous microtubule disassembly. To measure the effect on microtubule disassembly, 34  $\mu$ M pre-formed microtubules were incubated with  $\alpha$ B crystallin peptides (170  $\mu$ M), wt and mutant  $\alpha$ B crystallins (6.8  $\mu$ M and 34  $\mu$ M) at 23°C for 20 minutes. The decrease in DAPI fluorescence at  $\lambda = 460$  nm was measured continuously for 20 minutes by exciting the samples at  $\lambda = 355$  nm using a Perkin Elmer Victor<sup>3</sup> V fluorescence plate reader.

### Tubulin aggregation assays

The effect of  $\alpha$ B crystallin peptides and mutants on the thermal aggregation of tubulin was evaluated using ultra-violet spectroscopy. Bovine brain tubulin was dissolved to 200  $\mu$ M in 80 mM PIPES, 2 mM MgCl<sub>2</sub>, 0.5 mM EGTA, pH 6.9. 4.25  $\mu$ l of 0.08, 0.4, or 2 mM test peptide or protein was diluted into 40  $\mu$ l of 80 mM PIPES, 2 mM MgCl<sub>2</sub>, 0.5 mM EGTA, pH 6.9. 8.5  $\mu$ l of the 200  $\mu$ M tubulin was added to each sample. Samples were heated at 52°C and the absorbance at  $\lambda = 340$  nm was measured continuously for 60 minutes using a Pharmacia Biotech Ultrospec 3000. GTP and glycerol were not present in the samples because they induce the assembly of microtubules.

### Homology modeling

The tubulin interactive sequences  $^{113}$ FISREFHR $_{120}$ ,  $^{131}$ LTITSSLS $_{138}$ , and  $^{156}$ ERTIPITRE $_{164}$  were mapped to a 3D structural model of human  $\alpha$ B crystallin computed previously [26]. The human  $\alpha$ B crystallin homology model was computed using the wheat sHSP16.9 X-ray crystal structure as described previously [26,34,35]. The C $\alpha$  root mean square deviation between the superimposed model of human  $\alpha$ B crystallin and the crystal structure of wheat sHSP16.9 was 3.25 Å. The model for the twenty-four subunit oligomer of human  $\alpha$ B crystallin was computed using co-ordinates of the *Methanococcus jannaschii* sHSP16.5 twenty-four subunit crystal structure described previously [36].

## RESULTS

The effects of synthetic peptides corresponding to five human  $\alpha$ B crystallin interactive sequences on microtubule assembly were investigated (Figure 1). When 34  $\mu$ M tubulin alone was incubated at 37°C, a rapid increase in DAPI fluorescence was observed due to the preferential binding of DAPI to assembled microtubules and maximum fluorescence was observed in approximately 45 minutes. The ST peptide slowed the rate of microtubule assembly by increasing the lag phase preceding the start of microtubule assembly without an effect on the amount of microtubules formed in 45 minutes. The DR peptide accelerated microtubule assembly without an effect on the total amount of microtubules formed in 45 minutes. In contrast, the FI peptide slowed microtubule assembly and decreased the amount of microtubules formed in 45 minutes. The LT and ER peptides increased both the rate of microtubule assembly and the amount of microtubules formed in 45 minutes. The effect of the LT and ER peptides was similar to Paclitaxel, a known promoter of microtubule assembly, while the effect of the FI peptide was similar but weaker than the effect of CaCl<sub>2</sub>, a known inhibitor of microtubule assembly.

Sequences in  $\alpha$ B crystallin that altered microtubule assembly overlapped with sequences for subunit-subunit interactions chaperone activity, and filament interactions, [26,27] (Figure 2). The overlap between  $\alpha$ B crystallin sequences that altered microtubule assembly and  $\alpha$ B crystallin chaperone sequences identified previously [27] suggested a functional role for  $\alpha$ B crystallin in tubulin/microtubule stabilization. Consequently, the effects of the  $\alpha$ B crystallin interactive sequences on microtubule

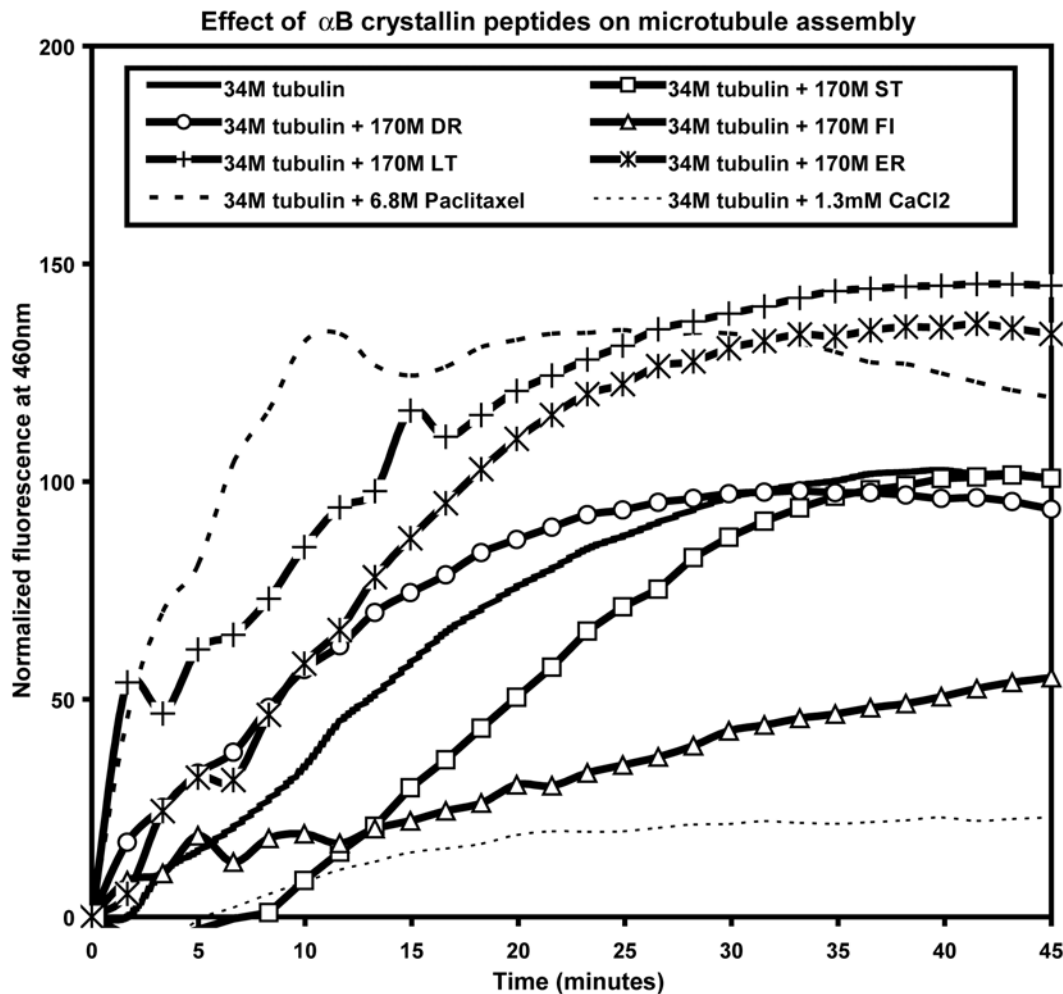

**Figure 1. Effect of  $\alpha$ B crystallin peptides on microtubule assembly.** Samples containing tubulin and  $\alpha$ B crystallin peptides or control molecules were excited at  $\lambda = 355$  nm and the fluorescence emission of DAPI bound to assembled microtubules was recorded at  $\lambda = 460$  nm. The fluorescence of the sample containing tubulin alone increased rapidly to a maximum value at 45 minutes of incubation at 37°C. The ST (N-terminus) and DR ( $\beta$ 3) peptides had no effect on total microtubule assembly, the FI (loop) peptide inhibited microtubule assembly, while the LT ( $\beta$ 8) and ER (C-terminus) peptides promoted microtubule assembly. The positive control, Paclitaxel, accelerated microtubule assembly, while the negative control, CaCl<sub>2</sub>, inhibited microtubule assembly which was consistent with previous reports [59,60].  
doi:10.1371/journal.pone.0000498.g001

disassembly and tubulin aggregation were investigated (Figure 3). Pre-formed microtubules (34  $\mu$ M) were incubated in the absence and presence of  $\alpha$ B crystallin peptides and controls at 23°C to induce disassembly of microtubules. In the absence of  $\alpha$ B crystallin peptides and controls, microtubules alone disassembled rapidly and minimum fluorescence was recorded in approximately 20 minutes. The FI and ER peptides inhibited microtubule disassembly by ~24% and 36% respectively similar to the microtubule-stabilizing molecule Paclitaxel, while the remaining peptides conferred little to no protection against the disassembly of microtubules.

The ability of the  $\alpha$ B crystallin peptides to protect against the thermal aggregation of tubulin was determined by measuring the optical density (OD<sub>340</sub>) of 34  $\mu$ M tubulin at 52°C for sixty minutes in the absence or presence of peptides and control molecules (Figure 3). In the absence of  $\alpha$ B crystallin peptides and controls, tubulin aggregated rapidly and a maximum optical density was recorded in approximately 60 minutes. The  $\alpha$  crystallin core domain peptides FI and LT had the strongest protective effects and decreased the aggregation of tubulin by ~42–44%. In

contrast, the N-terminal peptide ST, the  $\alpha$  crystallin core domain peptide DR, and the C-terminal peptide, ER, had weak protective effects and the aggregation of tubulin incubated with these peptides decreased by only 8–27% relative to the control. Microtubule assembly/disassembly and thermal aggregation assays identified the FI, LT, and ER peptides as interactive sequences in  $\alpha$ B crystallin that were important for the dynamic assembly of microtubules.

Microtubule assembly and disassembly, and tubulin aggregation assays were conducted with  $\alpha$ B crystallin mutants R120G,  $\alpha$ A $\beta$ 8, and  $\Delta$ 155–165, which contained mutations at sites corresponding to the FI, LT, and ER peptides respectively to confirm the results obtained with the synthetic peptides (Figure 4). Wt  $\alpha$ B crystallin increased microtubule assembly by ~41%, had no effect on the microtubule disassembly, and decreased the thermal aggregation of tubulin by 65%. With the  $\alpha$ B crystallin mutant R120G, which contains a single point mutation in the 113FISREFHR<sub>120</sub> sequence, microtubule assembly and disassembly were unchanged while tubulin aggregation decreased. The  $\alpha$ B crystallin mutant  $\alpha$ A $\beta$ 8, which contains multiple mutations at residues correspond-

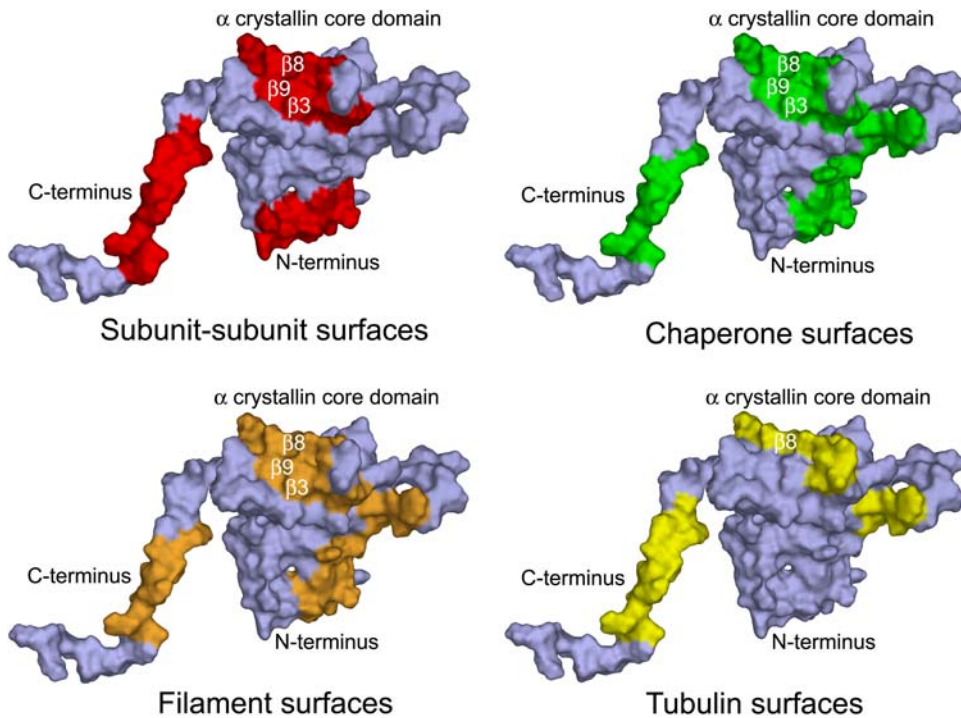

**Figure 2. Surface locations of the interactive sequences in  $\alpha$ B crystallin for subunit-subunit interactions, chaperone activity, and interactions with filaments and tubulin.** Interactive sequences for subunit-subunit interactions, chaperone activity, and interactions with filaments and tubulin identified by *in vitro* assays, mutagenesis, and pin array analysis were mapped to the N-terminal,  $\beta$ 3- $\beta$ 8- $\beta$ 9, and C-terminal interface regions of the human  $\alpha$ B crystallin homology model. The ST sequence is in the N-terminal extension, the DR, LT, and FI sequences are in the  $\beta$ 3 and  $\beta$ 8 strands and the loop of the  $\alpha$  crystallin core domain, and the ER sequence is in the C-terminal extension. Surfaces formed by the LT ( $\beta$ 8) and ER (C-terminal extension containing the Ile-X-Ile motif) sequences mediated subunit-subunit interactions as well as interactions with unfolded substrate proteins, filaments, and tubulin.  
doi:10.1371/journal.pone.0000498.g002

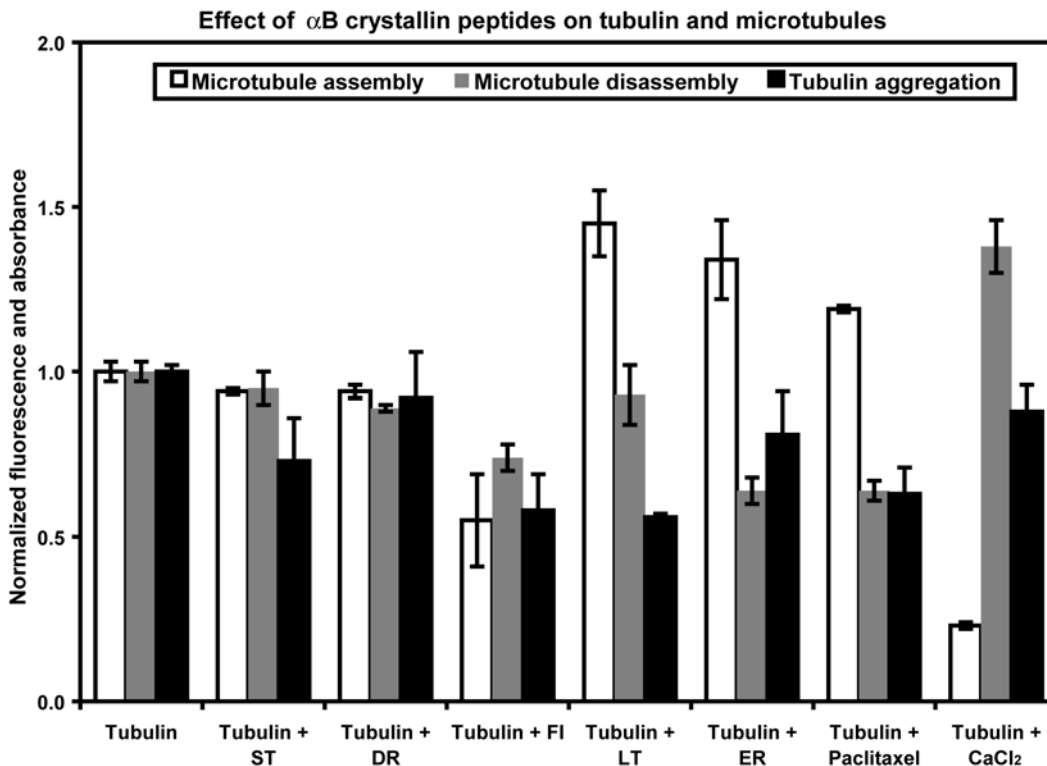

**Figure 3. Effect of synthetic  $\alpha$ B crystallin peptides on microtubule assembly, disassembly, and tubulin aggregation.** The DAPI fluorescence of assembled microtubules, disassembled tubulin, and tubulin aggregates in the absence of  $\alpha$ B crystallin peptides and control additives were normalized to 1.0. The FI, LT, and ER peptides had the strongest effect on microtubule assembly/disassembly and tubulin aggregation, while ST and DR peptides had little to no effect on microtubule assembly/disassembly and tubulin aggregation.  
doi:10.1371/journal.pone.0000498.g003

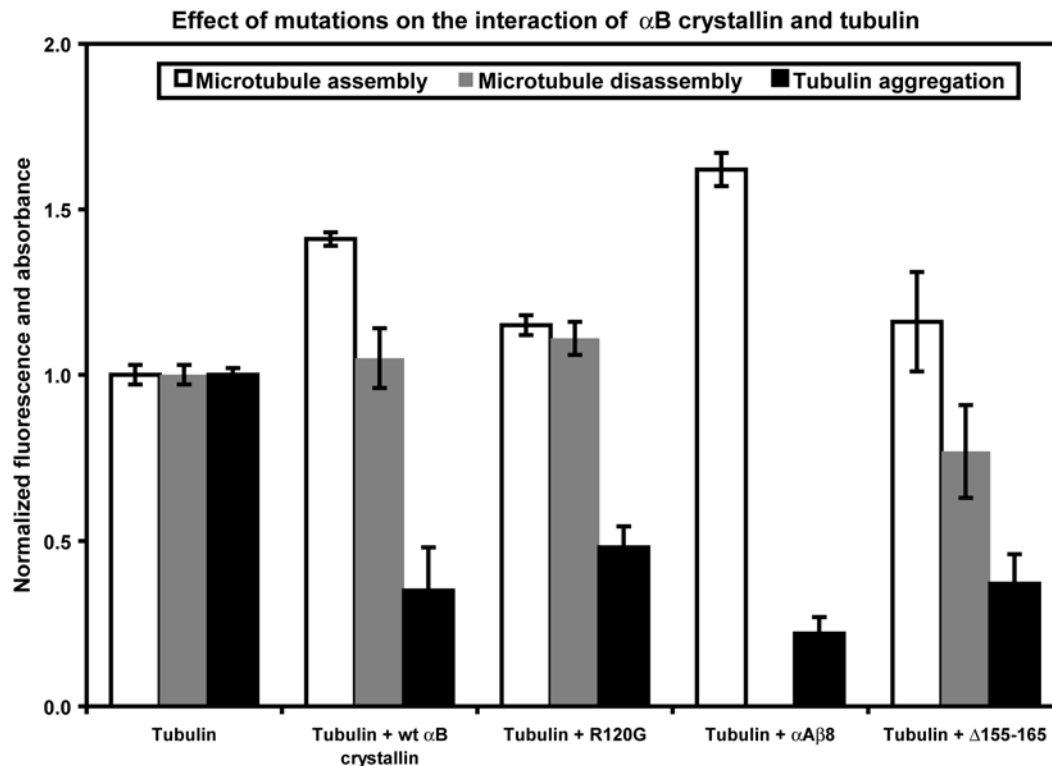

**Figure 4. Effect of mutations in three  $\alpha$ B crystallin interactive domains on microtubule assembly, disassembly, and tubulin aggregation.** The DAPI fluorescence of assembled microtubules, disassembled tubulin, and tubulin aggregates in the absence of  $\alpha$ B crystallin mutants was normalized to 1.0. In the presence of wt  $\alpha$ B crystallin, microtubule assembly increased, microtubule disassembly was unchanged, and tubulin aggregation decreased. In the presence of the R120G mutant, which contains a mutation of the Arg-120 residue in the  $_{113}\text{FISREFHR}_{120}$  interactive sequence of  $\alpha$ B crystallin, microtubule assembly decreased and microtubule disassembly and tubulin aggregation were similar to wt  $\alpha$ B crystallin. In the presence of the  $\alpha$ A $\beta$ 8 mutant, in which the  $\beta$ 8 sequence  $_{131}\text{LTITSSLS}_{138}$  of  $\alpha$ B crystallin was replaced with the  $\beta$ 8 sequence of  $\alpha$ A crystallin  $_{127}\text{SALSCLSS}_{134}$ , microtubule assembly increased, microtubule disassembly decreased, and tubulin aggregation was unchanged relative to wt  $\alpha$ B crystallin. In the presence of the C-terminal deletion mutant  $\Delta$ 155–165, microtubule assembly and disassembly were lower and tubulin aggregation was unchanged relative to wt  $\alpha$ B crystallin. Mutagenesis of sequences in  $\alpha$ B crystallin corresponding to the  $\alpha$ B crystallin peptides that altered tubulin-microtubule dynamics confirmed the effects of the  $\alpha$ B crystallin peptides on microtubule assembly/disassembly and tubulin aggregation. doi:10.1371/journal.pone.0000498.g004

ing to the  $_{131}\text{LTITSSLS}_{138}$  sequence increased microtubule assembly, completely inhibited microtubule disassembly, and decreased tubulin aggregation. The  $\Delta$ 155–165 mutant, which lacks residues 155–165 corresponding to the ER peptide, increased microtubule assembly, and decreased both microtubule disassembly and tubulin aggregation. The results confirmed the importance of the  $\alpha$ B crystallin sequences  $_{113}\text{FISREFHR}_{120}$ ,  $_{131}\text{LTITSSLS}_{138}$ , and  $_{156}\text{ERTIPITRE}_{164}$  in microtubule assembly, disassembly and aggregation.

To evaluate the concentration dependence of  $\alpha$ B crystallin on the assembly and disassembly of microtubules, a fixed amount (34  $\mu\text{M}$ ) of tubulin was incubated with increasing concentrations of wt  $\alpha$ B crystallin (Figure 5). At low concentrations of wt  $\alpha$ B crystallin, no measurable effect on microtubule assembly was observed. With increasing concentrations of  $\alpha$ B crystallin, microtubule assembly increased to a maximum and then declined at high concentrations of  $\alpha$ B crystallin where microtubule assembly was inhibited. With respect to the ratio of  $\alpha$ B crystallin to tubulin, the effect on assembly of microtubules was minimal when the ratio of  $\alpha$ B crystallin to tubulin was  $<1:4$ . When the ratio of  $\alpha$ B crystallin to tubulin was between 1:4 and 2:1, the amount of microtubules formed was 35–94% higher than tubulin alone. Microtubule assembly was optimal when the ratio of  $\alpha$ B crystallin to tubulin was approximately 1:2. When the ratio of tubulin to  $\alpha$ B crystallin was  $>2:1$  the amount of microtubules formed decreased

as much as 30–63% compared to tubulin alone and no microtubules were formed when the ratio of tubulin to  $\alpha$ B crystallin was 1:10. Wt  $\alpha$ B crystallin stabilized microtubules in a concentration dependent manner and was most effective within a narrow concentration range.

## DISCUSSION

Five interactive sequences in the sHSP and molecular chaperone, human  $\alpha$ B crystallin participate in the stabilization of tubulin/microtubules. Individual synthetic  $\alpha$ B crystallin peptides and full-length  $\alpha$ B crystallin mutants either promoted or inhibited microtubule assembly and disassembly suggesting a complex mechanism for the effect of wild type  $\alpha$ B crystallin on tubulin/microtubules. Synthetic peptides corresponding to the  $\alpha$ B crystallin sequences  $_{131}\text{LTITSSLS}_{138}$  and  $_{155}\text{ERTIPITRE}_{165}$  promoted microtubule assembly. In contrast, the synthetic peptide corresponding to the  $_{113}\text{FISREFHR}_{120}$  sequence inhibited microtubule assembly. The remaining  $\alpha$ B crystallin sequences  $_{41}\text{STSLSPFYLRRPPSFL-RAP}_{58}$  and  $_{73}\text{DRFSVNLDVKHFS}_{85}$  had little or no effect on microtubule assembly. The results were consistent with previous reports in which full-length wt  $\alpha$ B crystallin interacted with tubulin and modulated the assembly of tubulin into microtubules [17,21]. In thermal aggregation assays, the interactive sequences  $_{113}\text{FISREFHR}_{120}$  and  $_{131}\text{LTITSSLS}_{138}$  protected disassembled tubulin from unfolding and aggregation which was consistent with

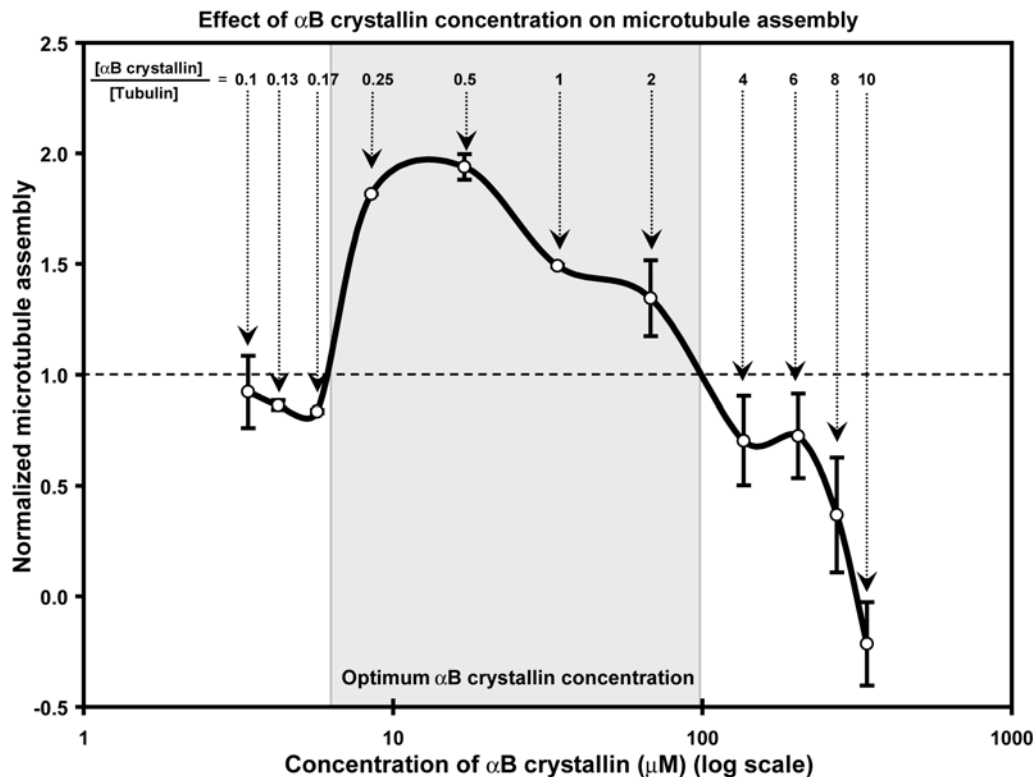

**Figure 5. Effect of  $\alpha$ B crystallin concentration on microtubule assembly.** Microtubule assembly (Y-axis) was sensitive to the concentration of wt  $\alpha$ B crystallin (X-axis). Microtubule assembly in the absence of  $\alpha$ B crystallin was normalized to 1.0. The ratio of  $\alpha$ B crystallin to tubulin for each concentration of  $\alpha$ B crystallin is listed at the top of the plot. For  $\alpha$ B crystallin to tubulin ratios  $<1:4$ , microtubule assembly was unchanged at 1.0. For ratios between 1:4 and 2:1, microtubule assembly was  $>1.0$  with maximum assembly observed at a tubulin to  $\alpha$ B crystallin ratio of approximately 1:2. For ratios  $>4:1$ , microtubule assembly was  $<1.0$ . For a  $\alpha$ B crystallin to tubulin ratio of 10:1, microtubule assembly was undetectable. The variation of microtubule assembly with increasing concentrations of human  $\alpha$ B crystallin is explained by the dynamic subunit model for the chaperone activity of  $\alpha$ B crystallin.

doi:10.1371/journal.pone.0000498.g005

previous reports that full-length wt  $\alpha$ B crystallin protected tubulin from unfolding and aggregation under stress [18–20,22].  $_{113}$ FIS-REFHR $_{120}$  and  $_{155}$ ERTIPITRE $_{165}$  are flexible and unstructured sequences in the loop region and the C-terminal extension respectively, and the  $_{131}$ LTITSSLSDDGV $_{142}$  sequence is in  $\beta$  strands 8 and 9 on the surface of the conserved  $\alpha$  crystallin core domain in the  $\alpha$ B crystallin homology model. The action of synthetic  $\alpha$ B crystallin peptides on the assembly and aggregation of tubulin/microtubules suggests that the interaction between sHSPs and tubulin/microtubules is due to surface exposed residues that did not require specific 3D conformations and mutagenesis of these exposed residues in wt  $\alpha$ B crystallin resulted in altered activity. In wt  $\alpha$ B crystallin, the 3D organization of the interactive sequences may be necessary for coordinating their collective activity in response to cell stress and in control of microtubule assembly during cell proliferation.

Previous studies involving protein pin array assays, site-directed mutagenesis, and size exclusion chromatography characterized the N-terminal sequence  $_{41}$ STSLSPFYLRPPSFLRAP $_{58}$ , the  $\alpha$  crystallin core domain sequences,  $_{73}$ DRFSVNLDVKHFS $_{85}$ ,  $_{113}$ FIS-REFHR $_{120}$ , and  $_{131}$ LTITSSLSDDGV $_{142}$ , and the C-terminal sequence,  $_{156}$ ERTIPITRE $_{164}$  as important sequences for subunit-subunit interactions, chaperone activity, and filament interactions [26,27,29,31](Figure 2). Site-directed mutagenesis of human  $\alpha$ B crystallin demonstrated that chaperone activity was independent of complex size and that chaperone activity required exposure of the same interactive domains on the surface of  $\alpha$ B crystallin that

were used in assembly [26,27,29,31,37]. This observation is consistent with the dynamic subunit model for  $\alpha$ B crystallin function in cells in which the dissociation of  $\alpha$ B crystallin subunits from  $\alpha$  crystallin complexes and/or filament networks regulates association with unfolded substrate proteins, and re-association into  $\alpha$  crystallin-substrate complexes [37]. The relative affinity of  $\alpha$ B crystallin for itself and selected substrate proteins explains the functional significance of the dynamic subunit model for sHSP assembly in regulation of sHSP structure and function [37].

The observation that the same  $\alpha$ B crystallin domains interact with unfolding substrate proteins during chaperone activity and interact with tubulin during microtubule assembly is consistent with the dynamic subunit model for sHSP function. The structural importance of the LT and ER sequences in the normal dynamic assembly and disassembly of  $\alpha$ B crystallin complexes and the functional role of the LT and ER sequences in promoting microtubule assembly further supports the dynamic subunit exchange model for sHSP function [26,34,36–41] (Figures 2 and 6). At high  $\alpha$ B crystallin concentrations ( $>100 \mu$ M) and large  $\alpha$ B crystallin:tubulin ratios ( $>4:1$ ), where it is expected that  $\alpha$ B crystallin was predominantly assembled into complexes, the LT and ER sequences in apposed  $\alpha$ B crystallin subunits interacted with each other and were unable to promote microtubules assembly (Figure 6). In contrast, the FI sequence, which inhibited microtubule assembly, remained accessible on the surface of the complex for interactions with tubulin (Figure 6). At low  $\alpha$ B crystallin concentrations ( $<8 \mu$ M) and small  $\alpha$ B crystallin:tubulin

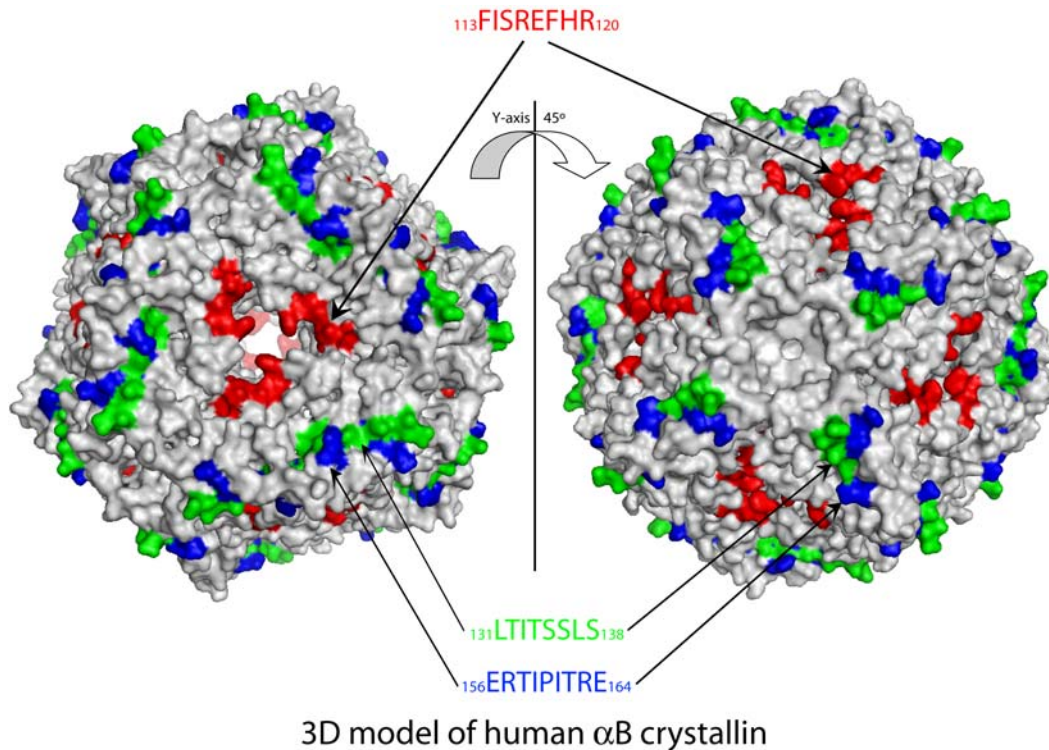

3D model of human  $\alpha$ B crystallin

**Figure 6. Model of the tubulin interactive sequences in the human  $\alpha$ B crystallin complex and their importance in the assembly of microtubules.** In the model, twenty-four subunits (grey) of  $\alpha$ B crystallin form a complex which is a hollow sphere containing eight windows entering the central cavity [34,36,38,61]. The  $\alpha$ B crystallin sequences  $^{113}\text{FISREFHR}_{120}$ ,  $^{131}\text{LTITSSLS}_{138}$ , and  $^{156}\text{ERTIPITRE}_{164}$  that modulate tubulin-microtubule dynamics are in red, green, and blue respectively. The  $^{113}\text{FISREFHR}_{120}$  sequence, which inhibits microtubule assembly is exposed on the surface of the hollow  $\alpha$ B crystallin complex.  $^{113}\text{FISREFHR}_{120}$  sequences from three separate  $\alpha$ B crystallin subunits surround each of the eight windows that lead into the hollow core of the complex. In contrast, the  $^{131}\text{LTITSSLS}_{138}$  and  $^{156}\text{ERTIPITRE}_{164}$  sequences, which promote microtubule assembly, are sites of subunit-subunit interactions in  $\alpha$ B crystallin with limited exposure on the surface of the complex. For these sequences to interact with tubulin and promote microtubule assembly, dissociation of the subunits from the complex is required. In contrast, tubulin binding to the inhibitory  $^{113}\text{FISREFHR}_{120}$  sequences can occur on the surface of the complex. The computed model for the human  $\alpha$ B crystallin complex was based on the *Methanococcus jannaschii* sHSP16.5 twenty-four subunit crystal structure described previously [62].  
doi:10.1371/journal.pone.0000498.g006

ratios (<1:4), the amount of  $\alpha$ B crystallin present was insufficient to modulate microtubule assembly and there was little or no effect on normal microtubule assembly. At intermediate  $\alpha$ B crystallin concentrations (8–100  $\mu\text{M}$ ) and  $\alpha$ B crystallin:tubulin ratios between 1:4 and 2:1, the LT and ER sequences were exposed on the surface of disassembled  $\alpha$ B crystallin subunits to stabilize microtubules and promote the assembly of additional microtubules. The overlap between interactive sites for assembly, chaperone activity, and filament interactions and their 3D organization on the surface of  $\alpha$ B crystallin subunits supports the dynamic subunit model for the physiological function of  $\alpha$ B crystallin, which involves the dynamic association, dissociation, and re-association of  $\alpha$ B crystallin with itself and target substrate proteins including tubulin. *In vivo*, the effect of  $\alpha$ B crystallin on microtubule assembly is determined by the dynamics of the equilibrium between free  $\alpha$ B crystallin subunits and  $\alpha$ B crystallin subunits self associated in oligomers or assembled in complexes with other protein substrates. If this interpretation is correct, measurement of the relative affinities between  $\alpha$ B crystallin subunits and selected substrates under normal and stress conditions will confirm the hypothesis that dynamic subunit assembly is responsible for the observed relationship between microtubule assembly and  $\alpha$ B crystallin concentration. Quantitative studies are being conducted using surface plasmon resonance (SPR) to test this hypothesis.

The results are consistent with the importance of sHSPs in the amyloid cascade pathway: formation of amyloid oligomers/fibrils→hyperphosphorylation of tau→disruption of tau-tubulin interactions→formation of neurofibrillary tangles (NFTs)→neurodegeneration [42–44]. Although various studies support the amyloid cascade hypothesis, the mechanism of interaction between amyloid plaques and NFTs remains uncharacterized. Although the constitutive expression of sHSPs in the normal brain is low, sHSPs including  $\alpha$ B crystallin are major constituents of amyloid plaques in Alzheimer's disease patients [45–47]. A recent study reported that there is a marked increase in the expression of  $\alpha$ B crystallin and sHSP25 in transgenic mouse models of familial amyotrophic lateral sclerosis, Parkinson's disease, dentato-rubral pallido-luysian atrophy and Huntington's disease [48]. The resulting high concentration of  $\alpha$ B crystallin in response to the toxic stress of amyloid- $\beta$  can destabilize microtubules. This hypothesis is consistent with the association of  $\alpha$ B crystallin with extracellular neurofibrillary tangles seen in Alzheimer's disease patients [49] but not intracellular NFTs [45]. Microtubule stabilizers may have therapeutic value in neurodegenerative diseases such as Alzheimer's disease where hyper-phosphorylation of the microtubule associated protein tau results in the disintegration of microtubules and the formation of NFTs [50,51]. Modulation of microtubule assembly is of great interest in the development of new cancer treatments [50,52–56]. The identifi-

cation of microtubule stabilizing peptides may have therapeutic significance in the development of novel bioactive peptides as anti-cancer agents [57,58]. Peptides that prevent microtubule disassembly can interrupt mitosis, prevent cell division, and trigger apoptosis. The effectiveness of two of the most important anti-cancer drugs today, Paclitaxel and Docetaxel whose mechanism of action involves stabilization of microtubules to disrupt cell division is limited by undesirable side effects including drug resistance. The  $\alpha$ B crystallin peptides LTITSSLSDGV and ERTIPITRE that alter tubulin $\leftrightarrow$ microtubule dynamics can be developed into safe new therapeutics for cancer, Alzheimer's disease, and taupathies.

In summary, interactive sequences on the surface of  $\alpha$ B crystallin that selectively recognize and stabilize tubulin can have dual effects on microtubule assembly that depend upon the  $\alpha$ B crystallin:tubulin ratio. Favorable ratios stabilize tubulin and

promote microtubule assembly and unfavorable ratios inhibit microtubule assembly. To our knowledge, this is the first experimental evidence for the functional importance of the dynamic subunit mechanism of sHSP assembly.

## ACKNOWLEDGMENTS

The authors are grateful to Dr. Elinor Adman for providing 3D coordinates for the human  $\alpha$ B crystallin oligomer.

## Author Contributions

Conceived and designed the experiments: JG. Performed the experiments: JG SH. Analyzed the data: JC JG SH. Contributed reagents/materials/analysis tools: JG. Wrote the paper: JC JG SH.

## REFERENCES

- Wang X, Klevitsky R, Huang W, Glasford J, Li F, et al. (2003) AlphaB-crystallin modulates protein aggregation of abnormal desmin. *Circ Res* 93: 998–1005.
- Minami M, Mizutani T, Kawanishi R, Suzuki Y, Mori H (2003) Neuronal expression of alphaB crystallin in cerebral infarction. *Acta Neuropathol (Berl)* 105: 549–554.
- Horwitz J (1992) Alpha-crystallin can function as a molecular chaperone. *Proc Natl Acad Sci U S A* 89: 10449–10453.
- Quinlan R (2002) Cytoskeletal competence requires protein chaperones. *Prog Mol Subcell Biol* 28: 219–233.
- Head MW, Hurwitz L, Kegel K, Goldman JE (2000) AlphaB-crystallin regulates intermediate filament organization in situ. *Neuroreport* 11: 361–365.
- Djabali K, Piron G, de Nechaud B, Portier MM (1999) alphaB-crystallin interacts with cytoplasmic intermediate filament bundles during mitosis. *Exp Cell Res* 253: 649–662.
- Muchowski PJ, Valdez MM, Clark JI (1999) AlphaB-crystallin selectively targets intermediate filament proteins during thermal stress. *Invest Ophthalmol Vis Sci* 40: 951–958.
- Liang P, MacRae TH (1997) Molecular chaperones and the cytoskeleton. *J Cell Sci* 110(Pt 13): 1431–1440.
- Prescott AR, Sandilands A, Hutcheson AM, Carter JM, Quinlan RA (1996) The intermediate filament cytoskeleton of the lens: an ever changing network through development and differentiation. A minireview. *Ophthalmic Res* 28 Suppl 1: 58–61.
- Gopalakrishnan S, Boyle D, Takemoto L (1993) Association of actin with alpha crystallins. *Trans Kans Acad Sci* 96: 7–12.
- Tomokane N, Iwaki T, Tateishi J, Iwaki A, Goldman JE (1991) Rosenthal fibers share epitopes with alpha B-crystallin, glial fibrillary acidic protein, and ubiquitin, but not with vimentin. *Immunoelectron microscopy with colloidal gold. Am J Pathol* 138: 875–885.
- Lieska N, Chen J, Maisel H, Romero-Herrera AE (1980) Subunit characterization of lens intermediate filaments. *Biochim Biophys Acta* 626: 136–153.
- Bennardini F, Wrzosek A, Chiesi M (1992) Alpha B-crystallin in cardiac tissue. Association with actin and desmin filaments. *Circ Res* 71: 288–294.
- Wisniewski T, Goldman JE (1998) Alpha B-crystallin is associated with intermediate filaments in astrocytoma cells. *Neurochem Res* 23: 385–392.
- Launay N, Goudeau B, Kato K, Vicart P, Liliensbaum A (2006) Cell signaling pathways to alphaB-crystallin following stresses of the cytoskeleton. *Exp Cell Res*.
- Maglara AA, Vasilaki A, Jackson MJ, McArdle A (2003) Damage to developing mouse skeletal muscle myotubes in culture: protective effect of heat shock proteins. *J Physiol* 548: 837–846.
- Fujita Y, Ohto E, Katayama E, Atomi Y (2004) alphaB-Crystallin-coated MAP microtubule resists nocodazole and calcium-induced disassembly. *J Cell Sci* 117: 1719–1726.
- Sakurai T, Fujita Y, Ohto E, Oguro A, Atomi Y (2005) The decrease of the cytoskeleton tubulin follows the decrease of the associating molecular chaperone alphaB-crystallin in unloaded soleus muscle atrophy without stretch. *Faseb J*.
- Xi JH, Bai F, McGaha R, Andley UP (2006) Alpha-crystallin expression affects microtubule assembly and prevents their aggregation. *Faseb J* 20: 846–857.
- Day RM, Gupta JS, MacRae TH (2003) A small heat shock/alpha-crystallin protein from encysted *Artemia* embryos suppresses tubulin denaturation. *Cell Stress Chaperones* 8: 183–193.
- Atomi Y, Fujita Y, Tanaka M, Ohto E, Arai H (2001) [Tubulin/microtubule dynamics and alpha B-crystallin]. *Biol Sci Space* 15: 206–207.
- Arai H, Atomi Y (1997) Chaperone activity of alpha B-crystallin suppresses tubulin aggregation through complex formation. *Cell Struct Funct* 22: 539–544.
- Kato K, Ito H, Inaguma Y, Okamoto K, Saga S (1996) Synthesis and accumulation of alphaB crystallin in C6 glioma cells is induced by agents that promote the disassembly of microtubules. *J Biol Chem* 271: 26989–26994.
- Bauer NG, Richter-Landsberg C (2006) The dynamic instability of microtubules is required for aggresome formation in oligodendroglial cells after proteolytic stress. *J Mol Neurosci* 29: 153–168.
- Mitra G, Saha A, Gupta TD, Poddar A, Das KP, et al. (2007) Chaperone-mediated inhibition of tubulin self-assembly. *Proteins*.
- Ghosh JG, Clark JI (2005) Insights into the domains required for dimerization and assembly of human alphaB crystallin. *Protein Sci* 14: 684–695.
- Ghosh JG, Estrada MR, Clark JI (2005) Interactive Domains for Chaperone Activity in the Small Heat Shock Protein, Human alphaB Crystallin. *Biochemistry* 44: 14854–14869.
- Ghosh JG, Shenoy AK Jr, Clark JI (2007) Interactions between Important Regulatory Proteins and Human alphaB Crystallin. *Biochemistry*.
- Ghosh JG, Estrada MR, Houck SA, Clark JI (2006) The function of the beta3 interactive domain in the small heat shock protein and molecular chaperone, human alphaB crystallin. *Cell Stress Chaperones* 11: 187–197.
- Ghosh JG, Estrada MR, Clark JI (2006) Structure-based analysis of the beta8 interactive sequence of human alphaB crystallin. *Biochemistry* 45: 9878–9886.
- Ghosh JG, Shenoy AK Jr, Clark JI (2006) N- and C-Terminal Motifs in Human alphaB Crystallin Play an Important Role in the Recognition, Selection, and Solubilization of Substrates. *Biochemistry* 45: 13847–13854.
- Peng MD, Muchowski PJ, van Den IP, Wu GJ, Hutcheson AM, et al. (1999) The cardiomyopathy and lens cataract mutation in alphaB-crystallin alters its protein structure, chaperone activity, and interaction with intermediate filaments in vitro. *J Biol Chem* 274: 33235–33243.
- Bonne D, Heusele C, Simon C, Pantaloni D (1985) 4',6-Diamidino-2-phenylindole, a fluorescent probe for tubulin and microtubules. *J Biol Chem* 260: 2819–2825.
- van Montfort RL, Basha E, Friedrich KL, Slingsby C, Vierling E (2001) Crystal structure and assembly of a eukaryotic small heat shock protein. *Nat Struct Biol* 8: 1025–1030.
- Ghosh JG, Estrada MS, Clark JI (2006) The function of the  $\beta$ 3 interactive domain in the small heat shock protein and molecular chaperone, human  $\alpha$ B crystallin. *Cell Stress Chaperones* 11: 187–197.
- Kim KK, Kim R, Kim SH (1998) Crystal structure of a small heat-shock protein. *Nature* 394: 595–599.
- Liu L, Ghosh JG, Clark JI, Jiang S (2006) Studies of alphaB crystallin subunit dynamics by surface plasmon resonance. *Anal Biochem* 350: 186–195.
- Van Montfort R, Slingsby C, Vierling E (2001) Structure and function of the small heat shock protein/alpha-crystallin family of molecular chaperones. *Adv Protein Chem* 59: 105–156.
- Pasta SY, Raman B, Ramakrishna T, Rao Ch M (2004) The IXI/V motif in the C-terminal extension of alpha-crystallins: alternative interactions and oligomeric assemblies. *Mol Vis* 10: 655–662.
- Liang JJ, Liu BF (2006) Fluorescence resonance energy transfer study of subunit exchange in human lens crystallins and congenital cataract crystallin mutants. *Protein Sci* 15: 1619–1627.
- Studer S, Narberhaus F (2000) Chaperone activity and homo- and hetero-oligomer formation of bacterial small heat shock proteins. *J Biol Chem* 275: 37212–37218.
- Hardy J (2006) Has the Amyloid Cascade Hypothesis for Alzheimer's Disease been Proved? *Curr Alzheimer Res* 3: 71–73.
- Hardy J (2003) The relationship between amyloid and tau. *J Mol Neurosci* 20: 203–206.
- Hardy JA, Higgins GA (1992) Alzheimer's disease: the amyloid cascade hypothesis. *Science* 256: 184–185.
- Wilhelmus MM, Otte-Holler I, Wesseling P, de Waal RM, Boelens WC, et al. (2006) Specific association of small heat shock proteins with the pathological hallmarks of Alzheimer's disease brains. *Neuropathol Appl Neurobiol* 32: 119–130.
- Renkawek K, Voorter CE, Bosman GJ, van Workum FP, de Jong WW (1994) Expression of alpha B-crystallin in Alzheimer's disease. *Acta Neuropathol (Berl)* 87: 155–160.



47. Shinohara H, Inaguma Y, Goto S, Inagaki T, Kato K (1993) Alpha B crystallin and HSP28 are enhanced in the cerebral cortex of patients with Alzheimer's disease. *J Neurol Sci* 119: 203–208.
48. Wang J, Martin E, Gonzales V, Borchelt DR, Lee MK (2007) Differential regulation of small heat shock proteins in transgenic mouse models of neurodegenerative diseases. *Neurobiol Aging*.
49. Mao JJ, Katayama S, Watanabe C, Harada Y, Noda K, et al. (2001) The relationship between alphaB-crystallin and neurofibrillary tangles in Alzheimer's disease. *Neuropathol Appl Neurobiol* 27: 180–188.
50. Attard G, Greystoke A, Kaye S, De Bono J (2006) Update on tubulin-binding agents. *Pathol Biol (Paris)* 54: 72–84.
51. Jordan A, Hadfield JA, Lawrence NJ, McGown AT (1998) Tubulin as a target for anticancer drugs: agents which interact with the mitotic spindle. *Med Res Rev* 18: 259–296.
52. Schiff PB, Horwitz SB (1980) Taxol stabilizes microtubules in mouse fibroblast cells. *Proc Natl Acad Sci U S A* 77: 1561–1565.
53. Montero A, Fossella F, Hortobagyi G, Valero V (2005) Docetaxel for treatment of solid tumours: a systematic review of clinical data. *Lancet Oncol* 6: 229–239.
54. Clavarezza M, Del Mastro L, Venturini M (2006) Taxane-containing chemotherapy in the treatment of early breast cancer patients. *Ann Oncol* 17 Suppl 7: vii22–vii26.
55. Simmons TL, Andrianasolo E, McPhail K, Flatt P, Gerwick WH (2005) Marine natural products as anticancer drugs. *Mol Cancer Ther* 4: 333–342.
56. Bai R, Pettit GR, Hamel E (1990) Dolastatin 10, a powerful cytostatic peptide derived from a marine animal. Inhibition of tubulin polymerization mediated through the vinca alkaloid binding domain. *Biochem Pharmacol* 39: 1941–1949.
57. Grubberger-Saal SK, Parsons R (2006) Is the small heat shock protein alphaB-crystallin an oncogene? *J Clin Invest* 116: 30–32.
58. Laudanski K, Wyczechowska D (2006) The distinctive role of small heat shock proteins in oncogenesis. *Arch Immunol Ther Exp (Warsz)*.
59. Thompson WC, Wilson L, Purich DL (1981) Taxol induces microtubule assembly at low temperature. *Cell Motil* 1: 445–454.
60. Berkowitz SA, Wolff J (1981) Intrinsic calcium sensitivity of tubulin polymerization. The contributions of temperature, tubulin concentration, and associated proteins. *J Biol Chem* 256: 11216–11223.
61. Haley DA, Horwitz J, Stewart PL (1998) The small heat-shock protein, alphaB-crystallin, has a variable quaternary structure. *J Mol Biol* 277: 27–35.
62. Muchowski PJ, Wu GJ, Liang JJ, Adman ET, Clark JI (1999) Site-directed mutations within the core “alpha-crystallin” domain of the small heat-shock protein, human alphaB-crystallin, decrease molecular chaperone functions. *J Mol Biol* 289: 397–411.
